# Supplementary material for: Matryoshka-Type Liposomes Offer the Improved Delivery of Temoporfin to Tumor Spheroids
Source: MDPI journal article supplement (doi:10.3390/cancers11091366), 2019-09-13
Supplement: s1 [file s1]

# Supplementary material: Matryoshka-type liposomes offer the improved delivery of temoporfin to tumor spheroids

Ilya Yakavets, Marie Millard, Laureline Lamy, Aurelie Francois, Dietrich Scheglmann, Arno Wiehe, Henri-Pierre Lassalle, Vladimir Zorin, Lina Bezdetnaya

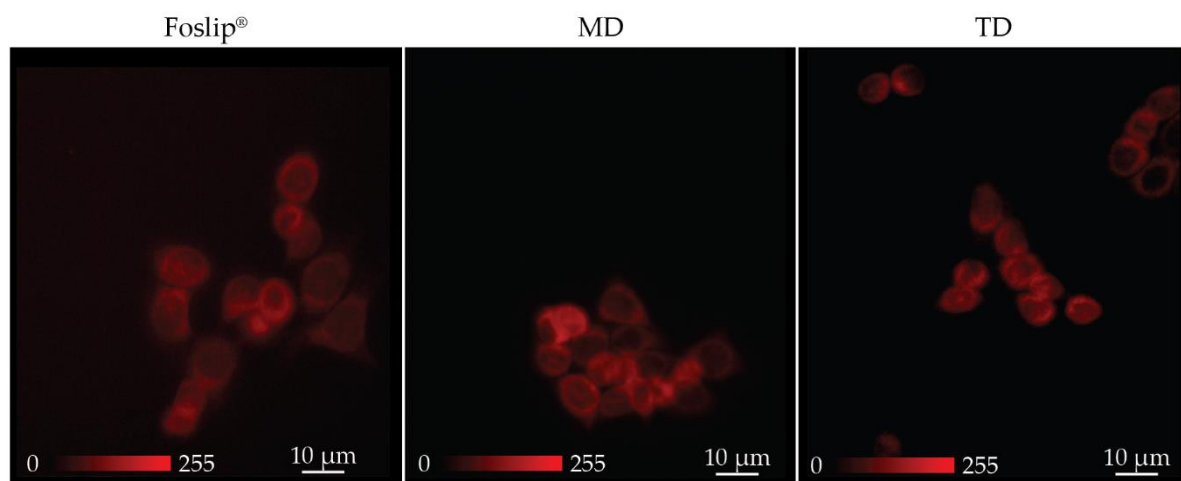

**Figure S1.** Typical epifluorescence images of mTHPC fluorescence in FaDu monolayer cells at 3h post-incubation with Foslip®, MD and TD. Scale bar: 10  $\mu\text{m}$ . The concentration of mTHPC was 1.5  $\mu\text{M}$ . Serum concentration was 2 %.

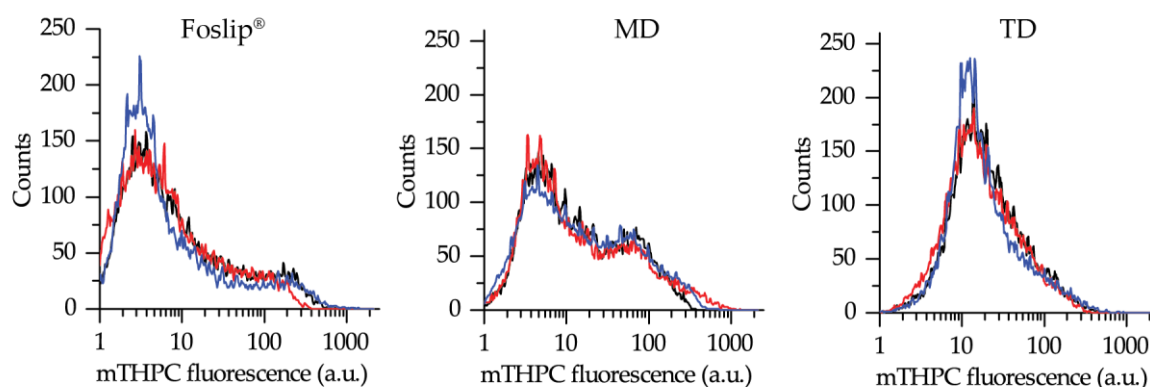

**Figure S2.** Flow cytometry histograms of HT29 spheroids treated with Foslip®, MD and TD for 24h. Each plot represents 3 independent experiments. mTHPC concentration was 4.5  $\mu\text{M}$ . Serum concentration was 2 %.

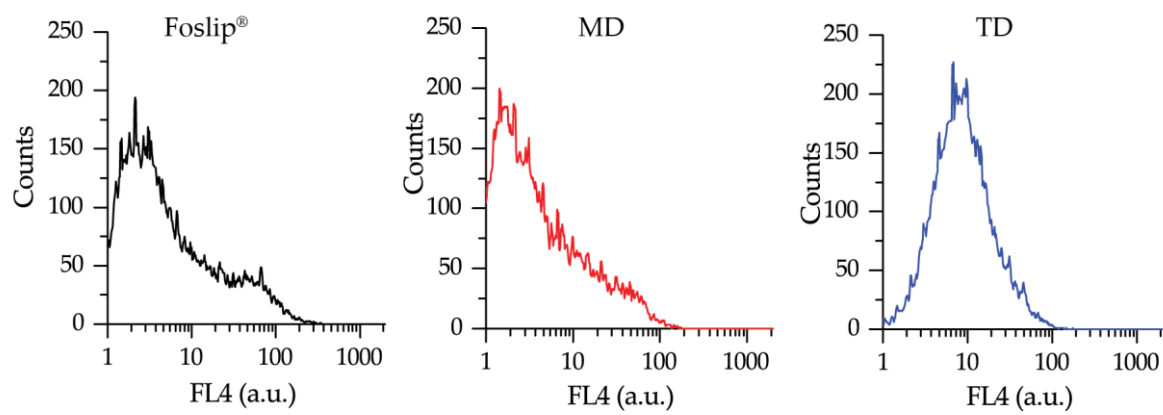

**Figure S3.** Typical flow cytometry histograms of FaDu spheroids treated with Foslip®, MD and TD for 24h. mTHPC concentration was 4.5  $\mu$ M. Serum concentration was 2 %.

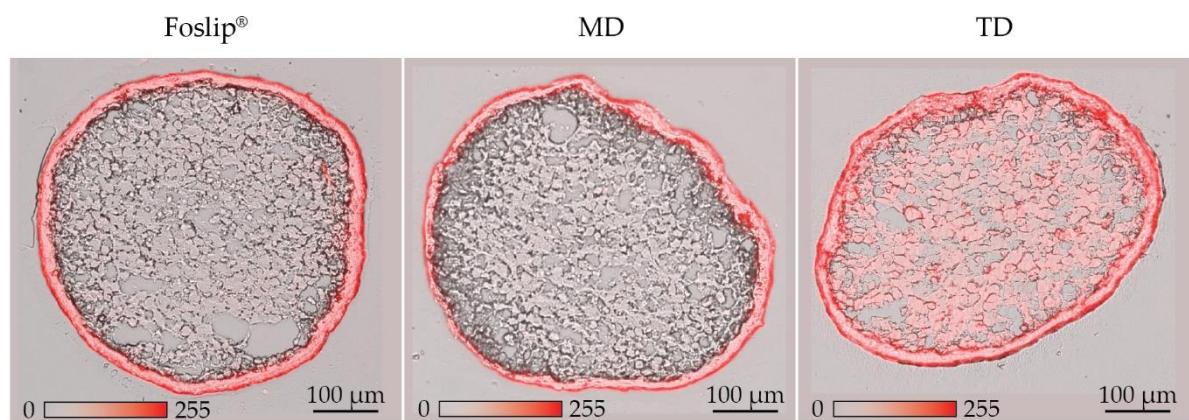

**Figure S4.** Typical brightfield/fluorescence overlay images of mTHPC in FaDu spheroids cryosections after 24h incubation with various mTHPC formulations (Foslip®, MD and TD). mTHPC concentration was 4.5  $\mu$ M. Serum concentration was 2 %. Fluorescence of mTHPC is displayed in red-color.

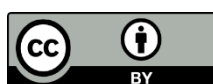

© 2019 by the authors. Licensee MDPI, Basel, Switzerland. This article is an open access article distributed under the terms and conditions of the Creative Commons Attribution (CC BY) license (<http://creativecommons.org/licenses/by/4.0/>).
